# Supplementary material for: Development of a core outcome set for clinical trials in inflammatory bowel disease: study protocol for a systematic review of the literature and identification of a core outcome set using a Delphi survey
Source: PubMed Central journal article supplement — BMJ Open. 2017 Jun 9;7(6):e016146. doi: 10.1136/bmjopen-2017-016146 (PMC5726090; doi:10.1136/bmjopen-2017-016146), 2017-06-09
Supplement: bmjopen-2017-016146supp001.pdf [file bmjopen-2017-016146supp001.pdf]

## Supplemental File 1 – PRISMA-P Checklist

| Section and topic                 | Item No | Checklist item                                                                                                                                                                                  | Manuscript Page and Section                                |
|-----------------------------------|---------|-------------------------------------------------------------------------------------------------------------------------------------------------------------------------------------------------|------------------------------------------------------------|
| <b>ADMINISTRATIVE INFORMATION</b> |         |                                                                                                                                                                                                 |                                                            |
| Title:                            |         |                                                                                                                                                                                                 |                                                            |
| Identification                    | 1a      | Identify the report as a protocol of a systematic review                                                                                                                                        | Page 1: Title                                              |
| Update                            | 1b      | If the protocol is for an update of a previous systematic review, identify as such                                                                                                              | Not applicable                                             |
| Registration                      | 2       | If registered, provide the name of the registry (such as PROSPERO) and registration number                                                                                                      | Page 10: Methods and Analysis                              |
| Authors:                          |         |                                                                                                                                                                                                 |                                                            |
| Contact                           | 3a      | Provide name, institutional affiliation, e-mail address of all protocol authors; provide physical mailing address of corresponding author                                                       | Pages 1-2: Affiliations                                    |
| Contributions                     | 3b      | Describe contributions of protocol authors and identify the guarantor of the review                                                                                                             | Page 24: Manuscript Contributions                          |
| Amendments                        | 4       | If the protocol represents an amendment of a previously completed or published protocol, identify as such and list changes; otherwise, state plan for documenting important protocol amendments | Not applicable                                             |
| Support:                          |         |                                                                                                                                                                                                 |                                                            |
| Sources                           | 5a      | Indicate sources of financial or other support for the review                                                                                                                                   | Page 12: No funding                                        |
| Sponsor                           | 5b      | Provide name for the review funder and/or sponsor                                                                                                                                               | Not applicable                                             |
| Role of sponsor or funder         | 5c      | Describe roles of funder(s), sponsor(s), and/or institution(s), if any, in developing the protocol                                                                                              | Not applicable                                             |
| <b>INTRODUCTION</b>               |         |                                                                                                                                                                                                 |                                                            |
| Rationale                         | 6       | Describe the rationale for the review in the context of what is already known                                                                                                                   | Page 8-9, Introduction<br>Page 12, Methods                 |
| Objectives                        | 7       | Provide an explicit statement of the question(s) the review will address with reference to participants, interventions, comparators, and outcomes (PICO)                                        | Page 12, Methods<br>(Step 1: Systematic literature review) |
| <b>METHODS</b>                    |         |                                                                                                                                                                                                 |                                                            |

|                                    |     |                                                                                                                                                                                                                                                  |                                                                                            |
|------------------------------------|-----|--------------------------------------------------------------------------------------------------------------------------------------------------------------------------------------------------------------------------------------------------|--------------------------------------------------------------------------------------------|
| Eligibility criteria               | 8   | Specify the study characteristics (such as PICO, study design, setting, time frame) and report characteristics (such as years considered, language, publication status) to be used as criteria for eligibility for the review                    | Pages 12-13, Methods (Types of studies, participants, interventions; Search methods)       |
| Information sources                | 9   | Describe all intended information sources (such as electronic databases, contact with study authors, trial registers or other grey literature sources) with planned dates of coverage                                                            | Pages 12-13 – Methods (Search Methods for identification of studies and study eligibility) |
| Search strategy                    | 10  | Present draft of search strategy to be used for at least one electronic database, including planned limits, such that it could be repeated                                                                                                       | Supplemental File 2                                                                        |
| Study records:                     |     |                                                                                                                                                                                                                                                  |                                                                                            |
| Data management                    | 11a | Describe the mechanism(s) that will be used to manage records and data throughout the review                                                                                                                                                     | Page 15 – Data extraction                                                                  |
| Selection process                  | 11b | State the process that will be used for selecting studies (such as two independent reviewers) through each phase of the review (that is, screening, eligibility and inclusion in meta-analysis)                                                  | Page 14 – Data extraction                                                                  |
| Data collection process            | 11c | Describe planned method of extracting data from reports (such as piloting forms, done independently, in duplicate), any processes for obtaining and confirming data from investigators                                                           | Page 14 – Data extraction                                                                  |
| Data items                         | 12  | List and define all variables for which data will be sought (such as PICO items, funding sources), any pre-planned data assumptions and simplifications                                                                                          | Page 12 – Types of studies, participants, and interventions                                |
| Outcomes and prioritization        | 13  | List and define all outcomes for which data will be sought, including prioritization of main and additional outcomes, with rationale                                                                                                             | Page 14 – Data extraction                                                                  |
| Risk of bias in individual studies | 14  | Describe anticipated methods for assessing risk of bias of individual studies, including whether this will be done at the outcome or study level, or both; state how this information will be used in data synthesis                             | Page 13-14 – Assessment of methodologic quality                                            |
| Data synthesis                     | 15a | Describe criteria under which study data will be quantitatively synthesised                                                                                                                                                                      | Not applicable - qualitative systematic review                                             |
|                                    | 15b | If data are appropriate for quantitative synthesis, describe planned summary measures, methods of handling data and methods of combining data from studies, including any planned exploration of consistency (such as $I^2$ , Kendall's $\tau$ ) | Not applicable – qualitative systematic review                                             |
|                                    | 15c | Describe any proposed additional analyses (such as sensitivity or subgroup analyses, meta-regression)                                                                                                                                            | Not applicable                                                                             |
|                                    | 15d | If quantitative synthesis is not appropriate, describe the type of summary planned                                                                                                                                                               | Page 14 – Data presentation                                                                |

---

|                                   |    |                                                                                                                               |                                                       |
|-----------------------------------|----|-------------------------------------------------------------------------------------------------------------------------------|-------------------------------------------------------|
| Meta-bias(es)                     | 16 | Specify any planned assessment of meta-bias(es) (such as publication bias across studies, selective reporting within studies) | Not applicable<br>(systematic review only)            |
| Confidence in cumulative evidence | 17 | Describe how the strength of the body of evidence will be assessed (such as GRADE)                                            | Page 13-14 –<br>Assessment of<br>Methodologic Quality |

---
