# Supplementary material for: Development of a core outcome set for clinical trials in inflammatory bowel disease: study protocol for a systematic review of the literature and identification of a core outcome set using a Delphi survey
Source: PubMed Central journal article supplement — BMJ Open. 2017 Jun 9;7(6):e016146. doi: 10.1136/bmjopen-2017-016146 (PMC5726090; doi:10.1136/bmjopen-2017-016146), 2017-06-09
Supplement: bmjopen-2017-016146supp002.pdf [file bmjopen-2017-016146supp002.pdf]

## **SUPPLEMENTAL FILE 2**

Systematic review search strategies

### **MEDLINE**

1. Inflammatory bowel disease.mp or exp Inflammatory Bowel Diseases/
2. Crohn's disease.mp or exp Crohn Disease/
3. ulcerative colitis.mp or exp Colitis, Ulcerative/
4. 1 or 2 or 3
5. limit #4 to yr="1998-Current"
6. trial.mp. or exp Clinical Trial, Phase I/ or exp Controlled Clinical Trial/ or exp Clinical Trial/ or exp Clinical Trial, Phase II/ or exp Clinical Trial, Phase III/ or exp Randomized Controlled Trial/
7. 5 and 6

### **PUBMED**

1. "Inflammatory Bowel Diseases" [Majr MeSH]
2. "Crohn Disease" [Majr MeSH]
3. "Colitis, Ulcerative" [Majr MeSH]
4. 1 or 2 or 3
5. "Clinical Trial" [Publication Type]
6. 4 and 6
7. Filter Publication date 1998/01/01 to Current

## **EMBASE**

1. exp inflammatory bowel disease/ or exp ulcerative colitis/ or exp Crohn disease
2. limit 1 to yr="1998-Current"
3. exp "phase 2 clinical trial (topic)"/ or exp "phase 4 clinical trial (topic)"/ or exp "clinical trial (topic)"/ or exp "phase 3 clinical trial (topic)"/ or exp "randomized controlled trial (topic)"/ or exp controlled clinical trial/ or exp "phase 1 clinical trial (topic)"/
4. 2 and 3

## **CENTRAL**

1. inflammatory bowel disease:ti,ab,kw (Word variations have been searched)
2. Crohn's disease:ti,ab,kw (Word variations have been searched)
3. Crohn disease:ti,ab,kw (Word variations have been searched)
4. Ulcerative colitis:ti,ab,kw (Word variations have been searched)
5. #1 OR #2 OR #3 OR #4
6. Publication Year from 1998 to 2016
